# Supplementary material for: Alcohol Consumption Is Associated with Poor Prognosis in Obese Patients with COVID-19: A Mendelian Randomization Study Using UK Biobank
Source: MDPI journal article supplement (doi:10.3390/nu13051592), 2021-05-10
Supplement: s1 [file s1]

**Table S1. Detailed information about the genetic variations of ADH1B/ SLC39A8/GCKR included in this study (Thompson et al., 2020).**

| SNP               | Locus   | Risk allele | Other allele | UK Biobank heavy alcohol drinker status (cases versus controls) |                 |                        | GERA database drinks/ week (among drinkers) |                       |
|-------------------|---------|-------------|--------------|-----------------------------------------------------------------|-----------------|------------------------|---------------------------------------------|-----------------------|
|                   |         |             |              | RAF                                                             | OR (95%CI)      | P value                | $\beta$ (SE)                                | P value               |
| <b>rs1229984</b>  | ADH1B   | C           | T            | 0.98                                                            | 1.58(1.48-1.70) | $3.30 \times 10^{-36}$ | 0.19(0.02)                                  | $2.9 \times 10^{-32}$ |
| <b>rs1260326</b>  | GCKR    | C           | T            | 0.61                                                            | 1.06(1.04-1.08) | $2.60 \times 10^{-8}$  | 0.03 (0.03)                                 | $1.1 \times 10^{-6}$  |
| <b>rs13107325</b> | SLC39A8 | C           | T            | 0.93                                                            | 1.12(1.08-1.16) | $1.60 \times 10^{-8}$  | 0.03(0.01)                                  | 0.02                  |

**Abbreviation:** OR, odds ratio; CI, confidence interval; RAF, risk allele frequency; GERA, Genetic Epidemiology Research in Adult Health and Aging; ADH1B, alcohol dehydrogenase 1B; GCKR, glucokinase regulator; SLC39A8, solute carrier family 39 member 8.

**Table S2. Disease diagnosis codes used by the UK Biobank**

| <b>Diseases</b>                                   | <b>Diagnosis code</b>                                                                |
|---------------------------------------------------|--------------------------------------------------------------------------------------|
| <b>Alcohol related diseases</b>                   |                                                                                      |
| Alcohol use disorder                              | F10.0-F10.3                                                                          |
| Alcohol liver diseases                            | K70.0-K70.9                                                                          |
| Alcohol pancreatitis                              | K85.2 and K86.0                                                                      |
| Alcoholic gastritis                               | K29.2                                                                                |
| Alcoholic cardiomyopathy                          | I42.6                                                                                |
| Alcoholic psychosis                               | F10.3-F10.9                                                                          |
| Alcoholic myopathy                                | G72.1                                                                                |
| Alcoholic polyneuropathy,                         | G62.1                                                                                |
| Degeneration of the nervous system due to alcohol | G31.2                                                                                |
| <b>Upper gastrointestinal diseases</b>            |                                                                                      |
| Oesophagitis                                      | K22.0-K22.9                                                                          |
| GERD                                              | K21.0, K21.9                                                                         |
| Peptic ulcer                                      | K25.0-K28.9                                                                          |
| Gastritis/duodenitis                              | K29.0-K29.8                                                                          |
| <b>Chronic lower respiratory diseases</b>         |                                                                                      |
| COPD                                              | J44.0, J44.1, J44.8, J44.9                                                           |
| Emphysema                                         | J43.0-J43.2, J43.8, J43.9                                                            |
| Bronchitis/Bronchiectasis                         | J40, J41.0, J41.1, J42, J47                                                          |
| Asthma                                            | J45.0, J45.1, J45.8, J45.9, J46                                                      |
| <b>Chronic heart diseases</b>                     |                                                                                      |
| Heart failure                                     | I50.0-I50.9                                                                          |
| Hypertensive                                      | I10-I15.9                                                                            |
| Chronic ischaemic heart disease                   | I23.0-I25.9                                                                          |
| <b>Diabetes mellitus</b>                          | E10.0-E14.9                                                                          |
| <b>Dementia</b>                                   | F00.0-F03                                                                            |
| <b>Liver cirrhosis and/or liver failure</b>       | R18, K70.3, K71.7, K72.9, K74.3-K74.6, K76.6, K76.7, K70.4, K72, K72.0, K72.1, K72.9 |
| <b>Renal failure</b>                              | N17.0-N19                                                                            |
| <b>AIDS</b>                                       | B20.0-B24                                                                            |

**Abbreviation:** GERD, gastroesophageal reflux disease; COPD, chronic obstructive pulmonary disease; AIDS, acquired immunodeficiency syndrome.

**Table S3. Association of observed confounders with alcohol consumption**

| <b>Variables</b>                       | <b>Non-drinkers<br/>(n=4496)</b> | <b>Frequent drinkers<br/>(n=8441)</b> | <b>Light drinkers<br/>(n=1156)</b> | <b>Moderate drinkers<br/>(n=3795)</b> | <b>Heavy drinkers<br/>(n=3490)</b> | <b>q-value</b> |
|----------------------------------------|----------------------------------|---------------------------------------|------------------------------------|---------------------------------------|------------------------------------|----------------|
| <b>Age (years), n(%)</b>               |                                  |                                       |                                    |                                       |                                    | 0.002          |
| <65                                    | 1379(30.7)                       | 2362(28.0)                            | 330(28.5)                          | 1012(26.7)                            | 1020(29.2)                         |                |
| ≥65                                    | 3117(69.3)                       | 6079(72.0)                            | 826(71.5)                          | 2783(73.3)                            | 2470(70.8)                         |                |
| <b>Male, n(%)</b>                      | 1648(36.7)                       | 4687(55.5)                            | 414(35.8)                          | 2502(65.9)                            | 1771(50.7)                         | <0.001         |
| <b>Race, n(%)</b>                      |                                  |                                       |                                    |                                       |                                    | <0.001         |
| No white                               | 622(13.9)                        | 286(3.4)                              | 56(4.9)                            | 149(3.9)                              | 81(2.3)                            |                |
| White                                  | 3851(86.1)                       | 8131(96.6)                            | 1090(95.1)                         | 3636(96.1)                            | 3405(97.7)                         |                |
| <b>BMI categories, n(%)</b>            |                                  |                                       |                                    |                                       |                                    | <0.001         |
| Normal weight (18.5-24.9)              | 1059(24.2)                       | 2363(28.6)                            | 365(32.2)                          | 1008(27.2)                            | 990(29.0)                          |                |
| Underweight (<18.5)                    | 26(0.6)                          | 38(0.5)                               | 12(1.1)                            | 10(0.3)                               | 16(0.5)                            |                |
| Overweight (25-29.9)                   | 1616(37.0)                       | 3616(43.8)                            | 459(40.5)                          | 1691(45.6)                            | 1466(43.0)                         |                |
| Obesity (≥30)                          | 1671(38.2)                       | 2232(27.1)                            | 296(26.1)                          | 999(26.9)                             | 937(27.5)                          |                |
| <b>Blood type, n(%)</b>                |                                  |                                       |                                    |                                       |                                    | 0.002          |
| OO                                     | 1853(41.3)                       | 3605(42.8)                            | 525(45.6)                          | 1610(42.5)                            | 1470(42.1)                         | 0.002          |
| AA+AO                                  | 181(4.0)                         | 266(3.2)                              | 45(3.9)                            | 123(3.2)                              | 98(2.8)                            |                |
| BB+BO                                  | 514(11.5)                        | 815(9.7)                              | 108(9.4)                           | 371(9.8)                              | 336(9.6)                           |                |
| AB                                     | 1941(43.2)                       | 3745(44.4)                            | 473(41.1)                          | 1688(44.5)                            | 1584(45.4)                         |                |
| <b>Current smoking, n(%)</b>           |                                  |                                       |                                    |                                       |                                    | <0.001         |
| No                                     | 3908(87.0)                       | 7421(88.0)                            | 1064(92.1)                         | 3445(90.8)                            | 2912(83.5)                         |                |
| Only occasionally                      | 122(2.7)                         | 274(3.2)                              | 23(2.0)                            | 104(2.7)                              | 147(4.2)                           |                |
| Most or all days                       | 461(10.3)                        | 741(8.8)                              | 68(5.9)                            | 244(6.4)                              | 429(12.3)                          |                |
| <b>Comorbidities, n(%)</b>             |                                  |                                       |                                    |                                       |                                    |                |
| <b>Upper gastrointestinal diseases</b> |                                  |                                       |                                    |                                       |                                    |                |

|                                             |            |            |           |            |            |        |
|---------------------------------------------|------------|------------|-----------|------------|------------|--------|
| Oesophagitis                                | 239(5.3)   | 361(4.3)   | 36(3.1)   | 175(4.6)   | 150(4.3)   | 0.01   |
| GERD                                        | 601(13.4)  | 836(9.9)   | 121(10.5) | 356(9.4)   | 359(10.3)  | <0.001 |
| Peptic ulcer                                | 187(4.2)   | 266(3.2)   | 28(2.4)   | 117(3.1)   | 121(3.5)   | 0.01   |
| Gastritis/duodenitis                        | 664(14.8)  | 868(10.3)  | 126(10.9) | 374(9.9)   | 369(10.5)  | <0.001 |
| <b>Chronic lower respiratory diseases</b>   |            |            |           |            |            |        |
| COPD                                        | 340(7.6)   | 446(5.3)   | 43(3.7)   | 193(5.1)   | 210(6.0)   | <0.001 |
| Emphysema                                   | 63(1.4)    | 84(1.0)    | 8(0.7)    | 44(1.2)    | 32(0.9)    | 0.11   |
| Bronchitis/Bronchiectasis                   | 78(1.7)    | 126(1.5)   | 25(2.2)   | 50(1.3)    | 51(1.5)    | 0.18   |
| Asthma                                      | 640(14.2)  | 821(9.7)   | 115(9.9)  | 346(9.1)   | 360(10.3)  | <0.001 |
| <b>Chronic heart diseases</b>               |            |            |           |            |            |        |
| Heart failure                               | 216(4.8)   | 290(3.4)   | 29(2.5)   | 139(3.7)   | 122(3.5)   | 0.001  |
| Hypertensive                                | 1839(40.9) | 2857(33.8) | 372(32.2) | 1291(34.0) | 1194(34.2) | <0.001 |
| Chronic ischaemic heart disease             | 699(15.5)  | 1038(12.3) | 121(10.5) | 514(13.5)  | 403(11.5)  | <0.001 |
| <b>Diabetes mellitus</b>                    | 796(17.7)  | 770(9.1)   | 117(10.1) | 393(10.4)  | 260(7.4)   | <0.001 |
| <b>Liver cirrhosis and/or liver failure</b> | 43(1.0)    | 48(0.6)    | 6(0.5)    | 15(0.4)    | 27(0.8)    | 0.02   |
| <b>Renal failure</b>                        | 408(9.1)   | 541(6.4)   | 78(6.7)   | 257(6.8)   | 206(5.9)   | <0.001 |
| <b>Insomnia</b>                             | 3578(79.7) | 6486(76.9) | 885(77.0) | 2831(74.6) | 2770(79.4) | <0.001 |
| <b>Dementia</b>                             | 37(0.8)    | 56(0.7)    | 13(1.1)   | 22(0.6)    | 21(0.6)    | 0.18   |
| <b>Tumor</b>                                | 461(10.3)  | 862(10.2)  | 114(9.9)  | 391(10.3)  | 357(10.2)  | 1.00   |
| <b>AIDS</b>                                 | 5(0.1)     | 8(0.1)     | 2(0.2)    | 5(0.1)     | 1(0.03)    | 1.00   |
| <b>COVID-19 positivity, n(%)</b>            | 643(14.3)  | 927(11.0)  | 126(10.9) | 433(11.4)  | 368(10.5)  | <0.001 |
| <b>COVID-19 positive patients, n(%)</b>     |            |            |           |            |            |        |
| <b>Death</b>                                | 115(17.9)  | 172(18.6)  | 14(11.1)  | 90(20.8)   | 68(18.5)   | 0.43   |
| <b>ICU admission and death</b>              | 147(22.9)  | 219(23.6)  | 21(16.7)  | 115(26.6)  | 83(22.6)   | 0.58   |

**q-value** was calculated by false discovery rate (FDR) method. **Abbreviation:** BMI, body mass index; GERD, gastroesophageal reflux disease; COPD, chronic obstructive pulmonary disease; AIDS, acquired immunodeficiency syndrome; COVID-19, coronavirus disease 2019; ICU, intensive care unit.

**Table S4. Association of genetic variations of ADH1B/SLC39A8/GCKR with outcomes of interest in white participants**

| <b>Instrumental variables</b>                   | <b>OR of SARS-CoV-2 infection</b> | <b>HR of death in COVID-19 positive patients</b> | <b>OR of ICU admission and death in COVID-19 positive patients</b> |
|-------------------------------------------------|-----------------------------------|--------------------------------------------------|--------------------------------------------------------------------|
| <b>ADH1B one or two fast alleles vs. none</b>   | 0.97(0.75-1.25)                   | 0.72(0.37-1.39)                                  | 0.59(0.31-1.14)                                                    |
| <b>P-value</b>                                  | 0.78                              | 0.32                                             | 0.12                                                               |
| <b>SLC39A8 one or two fast alleles vs. none</b> | 0.98(0.84-1.16)                   | 1.12(0.80-1.57)                                  | 1.16(0.82-1.65)                                                    |
| <b>P-value</b>                                  | 0.84                              | 0.52                                             | 0.39                                                               |
| <b>GCKR one or two fast alleles vs. none</b>    | 0.99(0.88-1.12)                   | 0.90(0.70-1.16)                                  | 0.84 (0.65-1.08)                                                   |
| <b>P-value</b>                                  | 0.92                              | 0.41                                             | 0.18                                                               |
| <b>Unweighted allele score</b>                  | 0.99(0.93-1.07)                   | 0.97(0.83-1.12)                                  | 0.92(0.79-1.07)                                                    |
| <b>P-value</b>                                  | 0.92                              | 0.66                                             | 0.27                                                               |
| <b>Weighted allele score</b>                    | 0.96(0.31-2.9)7                   | 0.32(0.02-4.48)                                  | 0.11(0.01-1.63)                                                    |
| <b>P-value</b>                                  | 0.94                              | 0.40                                             | 0.11                                                               |

**Abbreviation:** OR, odds ratio; HR, hazard ratio; CI, confidence interval; ICU, intensive care unit.

**Table S5. Logistic/Cox regression and Mendelian randomization analyses of the associations of alcohol consumption with the risk of SARS-CoV-2 infection and the risk of death of COVID-19 in white participants**

| Exposure and outcomes                 | The risk of SARS-CoV-2 infection |                  |         | The risk of death |                 |         |
|---------------------------------------|----------------------------------|------------------|---------|-------------------|-----------------|---------|
|                                       | Case/total                       | OR (95%CI)       | q-value | Case/total        | HR (95%CI)      | q-value |
| <b>Logistic/Cox regression</b>        |                                  |                  |         |                   |                 |         |
| <b>Drinking status in four levels</b> |                                  |                  |         |                   |                 |         |
| Never/infrequent drinkers             | 637/3750                         | 1                |         | 189/637           | 1               |         |
| Light drinkers                        | 53/326                           | 0.95(0.70-1.29)  | 0.83    | 8/53              | 0.48(0.23-1.02) | 0.17    |
| Moderate drinkers                     | 337/1968                         | 1.01(0.87-1.17)  | 0.90    | 113/337           | 1.21(0.96-1.54) | 0.16    |
| Heavy drinkers                        | 224/1456                         | 0.89(0.75-1.050) | 1       | 83/224            | 1.29(0.99-1.67) | 0.12    |
| <b>Drinking status in two levels</b>  |                                  |                  |         |                   |                 |         |
| Never/infrequent drinker              | 637/3750                         | 1                | 0.71    | 189/637           | 1               | 0.14    |
| Frequent drinkers                     | 614/3750                         | 0.96(0.85-1.08)  |         | 204/614           | 1.18(0.96-1.44) |         |
| <b>Frequent drinkers</b>              |                                  |                  |         |                   |                 |         |
| Weekly alcohol consumption            | 614/3750                         | 0.93(0.84-1.04)  | 0.62    | 204/614           | 1.18(0.99-1.41) | 0.10    |
| <b>Mendelian randomization</b>        |                                  |                  |         |                   |                 |         |
| <b>Unweighted allele score</b>        |                                  |                  |         |                   |                 |         |
| <b>Drinking status in two levels</b>  |                                  |                  |         |                   |                 |         |
| Never/infrequent drinker              | 637/3750                         | 1                | 0.84    | 189/637           | 1               | 0.12    |
| Frequent drinkers                     | 614/3750                         | 0.96(0.85-1.08)  |         | 204/614           | 1.18(0.96-1.44) |         |
| <b>Frequent drinkers</b>              |                                  |                  |         |                   |                 |         |
| Weekly alcohol consumption            | 614/3750                         | 0.99(0.99-1.00)  | 0.49    | 204/614           | 1.01(1.00-1.02) | 0.23    |
| <b>Weighted allele score</b>          |                                  |                  |         |                   |                 |         |
| <b>Drinking status in two levels</b>  |                                  |                  |         |                   |                 |         |
| Never/infrequent drinker              | 637/3750                         | 1                | 0.67    | 189/637           | 1               | 0.11    |
| Frequent drinkers                     | 614/3750                         | 0.96(0.85-1.09)  |         | 204/614           | 1.18(0.96-1.44) |         |

**Frequent drinkers**

|                            |          |                 |      |         |                 |      |
|----------------------------|----------|-----------------|------|---------|-----------------|------|
| Weekly alcohol consumption | 614/3750 | 0.99(0.99-1.00) | 0.81 | 204/614 | 1.01(1.00-1.02) | 0.41 |
|----------------------------|----------|-----------------|------|---------|-----------------|------|

**Analyses** were performed in PSM cohort. Matching factors for PSM including age, sex, BMI categories, current smoking status, alcohol related diseases, asthma, emphysema, COPD, bronchitis/bronchiectasis, esophagitis, gastritis/duodenitis, peptic ulcer, GERD, hypertensive, chronic ischemic heart disease, heart failure, diabetes, dementia, renal failure, liver cirrhosis and/or liver failure, tumor and AIDS.

**q-value** was calculated by false discovery rate (FDR) method.

**Abbreviation:** OR, odds ratio; HR, hazard ratio; CI, confidence interval; PSM, propensity score matching; BMI, body mass index; GERD, gastroesophageal reflux disease; COPD, chronic obstructive pulmonary disease; AIDS, acquired immunodeficiency syndrome.

**Table S6. Logistic/Cox regression and Mendelian randomization analyses of the associations of alcohol consumption with the risk of SARS-CoV-2 infection and the risk of death of COVID-19 in white participants who were overweight but not obese.**

| Exposure and outcomes                 | The risk of SARS-CoV-2 infection (Overweight) |                 |         | The risk of death (Overweight) |                 |         |
|---------------------------------------|-----------------------------------------------|-----------------|---------|--------------------------------|-----------------|---------|
|                                       | Case/total                                    | OR (95%CI)      | q-value | Case/total                     | HR (95%CI)      | q-value |
| <b>Logistic and Cox regression</b>    |                                               |                 |         |                                |                 |         |
| <b>Drinking status in four levels</b> |                                               |                 |         |                                |                 |         |
| Never/infrequent drinkers             | 181/1383                                      | 1               |         | 34/181                         | 1               |         |
| Light drinkers                        | 52/431                                        | 0.88(0.48-1.60) | 0.76    | 8/52                           | 0.35(0.05-2.54) | 1.00    |
| Moderate drinkers                     | 193/1622                                      | 0.97(0.75-1.25) | 0.80    | 43/193                         | 1.20(0.72-2.01) | 1.00    |
| Heavy drinkers                        | 142/1433                                      | 0.77(0.56-1.04) | 0.83    | 18/142                         | 0.96(0.51-1.83) | 0.91    |
| <b>Drinking status in two levels</b>  |                                               |                 |         |                                |                 |         |
| Never/infrequent drinker              | 181/1383                                      | 1               | 0.49    | 34/181                         | 1               | 1.00    |
| Frequent drinkers                     | 387/3486                                      | 0.88(0.71-1.10) |         | 69/387                         | 1.05(0.66-1.67) |         |
| <b>Frequent drinkers</b>              |                                               |                 |         |                                |                 |         |
| Weekly alcohol consumption            | 387/3486                                      | 0.91(0.74-1.11) | 0.53    | 69/387                         | 1.19(0.79-1.77) | 1.00    |
| <b>Mendelian randomization</b>        |                                               |                 |         |                                |                 |         |
| <b>Unweighted allele score</b>        |                                               |                 |         |                                |                 |         |
| <b>Drinking status in two levels</b>  |                                               |                 |         |                                |                 |         |
| Never/infrequent drinker              | 181/1383                                      | 1               | 0.60    | 34/181                         | 1               | 1.00    |
| Frequent drinkers                     | 387/3486                                      | 0.88(0.71-1.10) |         | 69/387                         | 1.05(0.66-1.67) |         |
| <b>Frequent drinkers</b>              |                                               |                 |         |                                |                 |         |
| Weekly alcohol consumption            | 387/3486                                      | 0.99(0.98-1.00) | 0.62    | 69/387                         | 1.01(0.96-1.03) | 1.00    |
| <b>Weighted allele score</b>          |                                               |                 |         |                                |                 |         |
| <b>Drinking status in two levels</b>  |                                               |                 |         |                                |                 |         |
| Never/infrequent drinker              | 181/1383                                      | 1               | 0.47    | 34/181                         | 1               | 0.98    |
| Frequent drinkers                     | 387/3486                                      | 0.90(0.72-1.13) |         | 69/387                         | 1.04(0.67-1.65) |         |



---

**Frequent drinkers**

|                            |          |                 |      |        |                 |      |
|----------------------------|----------|-----------------|------|--------|-----------------|------|
| Weekly alcohol consumption | 387/3486 | 0.99(0.98-1.00) | 0.57 | 69/387 | 1.01(0.99-1.02) | 1.00 |
|----------------------------|----------|-----------------|------|--------|-----------------|------|

---

**Analyses** were performed in PSM cohort. Matching factors for PSM including age, sex, BMI categories, current smoking status, alcohol related diseases, asthma, emphysema, COPD, bronchitis/bronchiectasis, esophagitis, gastritis/duodenitis, peptic ulcer, GERD, hypertensive, chronic ischemic heart disease, heart failure, diabetes, dementia, renal failure, liver cirrhosis and/or liver failure, tumor and AIDS.

**q-value** was calculated by false discovery rate (FDR) method.

**Abbreviation:** OR, odds ratio; HR, hazard ratio; CI, confidence interval; PSM, propensity score matching; BMI, body mass index; GERD, gastroesophageal reflux disease; COPD, chronic obstructive pulmonary disease; AIDS, acquired immunodeficiency syndrome.

**Table S7. Logistic/Cox regression and Mendelian randomization analyses of the associations of alcohol consumption with the risk of SARS-CoV-2 infection and the risk of serious clinical outcomes of COVID-19 in white participants**

| Exposure and outcomes                 | The risk of SARS-CoV-2 infection |                 |         | The risk of serious clinical outcomes |                 |         |
|---------------------------------------|----------------------------------|-----------------|---------|---------------------------------------|-----------------|---------|
|                                       | Case/total                       | OR (95%CI)      | q-value | Case/total                            | HR (95%CI)      | q-value |
| <b>Patients without obesity</b>       |                                  |                 |         |                                       |                 |         |
| <b>Logistic/Cox regression</b>        |                                  |                 |         |                                       |                 |         |
| <b>Drinking status in four levels</b> |                                  |                 |         |                                       |                 |         |
| Never drinkers                        | 96/618                           |                 |         | 52/96                                 | 1               |         |
| Light drinkers                        | 31/190                           | 1.06(0.68-1.65) | 1.00    | 12/31                                 | 0.73(0.26-2.08) | 0.71    |
| Moderate drinkers                     | 194/1260                         | 0.99(0.76-1.29) | 1.00    | 90/194                                | 0.94(0.49-1.80) | 0.85    |
| Heavy drinkers                        | 135/855                          | 1.02(0.77-1.36) | 1.00    | 66/135                                | 0.75(0.38-1.48) | 0.71    |
| <b>Drinking status in two levels</b>  |                                  |                 |         |                                       |                 |         |
| Never drinker                         | 96/618                           | 1               | 0.96    | 52/96                                 | 1               | 0.78    |
| Frequent drinkers                     | 360/2305                         | 1.01(0.79-1.29) |         | 168/360                               | 0.84(0.46-1.53) |         |
| <b>Frequent drinkers</b>              |                                  |                 |         |                                       |                 |         |
| Weekly alcohol consumption            | 360/2305                         | 0.92(0.80-1.07) | 1.00    | 168/360                               | 0.92(0.66-1.28) | 0.70    |
| <b>Mendelian randomization</b>        |                                  |                 |         |                                       |                 |         |
| <b>Drinking status in two levels</b>  |                                  |                 |         |                                       |                 |         |
| Never drinker                         | 96/618                           | 1               | 1.00    | 52/96                                 | 1               |         |
| Frequent drinkers                     | 360/2305                         | 1.02(0.80-1.30) |         | 168/360                               | 0.87(0.47-1.59) | 0.74    |
| <b>Frequent drinkers</b>              |                                  |                 |         |                                       |                 |         |
| Weekly alcohol consumption            | 360/2305                         | 0.99(0.99-1.01) | 1.00    | 168/360                               | 0.99(0.97-1.02) | 0.79    |
| <b>Patients with obesity</b>          |                                  |                 |         |                                       |                 |         |
| <b>Logistic/Cox regression</b>        |                                  |                 |         |                                       |                 |         |
| <b>Drinking status in four levels</b> |                                  |                 |         |                                       |                 |         |
| Never drinkers                        | 68/400                           | 1               |         | 33/68                                 | 1               |         |

|                                      |          |                 |      |         |                  |      |
|--------------------------------------|----------|-----------------|------|---------|------------------|------|
| Light drinkers                       | 22/136   | 0.94(0.56-1.59) | 1.00 | 10/22   | 5.63(1.52-20.83) | 0.03 |
| Moderate drinkers                    | 143/708  | 1.24(0.90-1.70) | 1.00 | 76/143  | 4.59(1.52-13.89) | 0.03 |
| Heavy drinkers                       | 89/601   | 0.85(0.60-1.20) | 1.00 | 50/89   | 5.68(1.81-17.87) | 0.01 |
| <b>Drinking status in two levels</b> |          |                 |      |         |                  |      |
| Never drinker                        | 68/400   | 1               | 1.00 | 33/68   | 1                | 0.02 |
| Frequent drinkers                    | 254/1445 | 1.04(0.78-1.4-) |      | 136/254 | 5.05(1.74-14.67) |      |
| <b>Frequent drinkers</b>             |          |                 |      |         |                  |      |
| Weekly alcohol consumption           | 254/1445 | 0.94(0.80-1.11) | 1.00 | 136/254 | 1.04(1.01-1.06)  | 0.04 |
| <b>Mendelian randomization</b>       |          |                 |      |         |                  |      |
| <b>Drinking status in two levels</b> |          |                 |      |         |                  |      |
| Never drinker                        | 68/400   | 1               | 1.00 | 33/68   | 1                | 0.04 |
| Frequent drinkers                    | 254/1445 | 1.03(0.77-1.39) |      | 136/254 | 5.23(1.77-15.45) |      |
| <b>Frequent drinkers</b>             |          |                 |      |         |                  |      |
| Weekly alcohol consumption           | 254/1445 | 0.99(0.99-1.00) | 1.00 | 136/254 | 1.04(1.01-1.07)  | 0.04 |

**Analyses** were performed in PSM cohort. Matching factors for PSM including age, sex, BMI categories, current smoking status, alcohol related diseases, asthma, emphysema, COPD, bronchitis/bronchiectasis, esophagitis, gastritis/duodenitis, peptic ulcer, GERD, hypertensive, chronic ischemic heart disease, heart failure, diabetes, dementia, renal failure, liver cirrhosis and/or liver failure, tumor and AIDS.

**q-value** was calculated by false discovery rate (FDR) method.

**Abbreviation:** OR, odds ratio; HR, hazard ratio; CI, confidence interval; PSM, propensity score matching; BMI, body mass index; GERD, gastroesophageal reflux disease; COPD, chronic obstructive pulmonary disease; AIDS, acquired immunodeficiency syndrome.

**Table S8. Mediation analysis of the effect of obesity on the associations of alcohol consumption with the risk of SARS-CoV-2 infection and the risk of death of COVID-19 in white participants**

| Effect                                        | The risk of SARS-CoV-2 infection |         | The risk of serious clinical outcomes |         |
|-----------------------------------------------|----------------------------------|---------|---------------------------------------|---------|
|                                               | Estimate (95% CI)                | P-value | Estimate (95% CI)                     | P-value |
| Direct effect not through moderator (Obesity) | -0.06(-0.20-0.08)                | 0.39    | -0.15(-0.36-0.06)                     | 0.16    |
| Indirect effect through moderator (Obesity)   | 0.0002(-0.003-0.002)             | 0.86    | 0.01(-0.02-0.04)                      | 0.57    |
| Total cause effect                            | -0.04(-0.15-0.08)                | 0.56    | -0.17(-0.32-0.02)                     | 0.12    |
| Proportion of mediation                       | 4.45%                            |         | 12.3%                                 |         |

**Analyses** were performed in PSM cohort. Matching factors for PSM including age, sex, BMI categories, current smoking status, alcohol related diseases, asthma, emphysema, COPD, bronchitis/bronchiectasis, esophagitis, gastritis/duodenitis, peptic ulcer, GERD, hypertensive, chronic ischemic heart disease, heart failure, diabetes, dementia, renal failure, liver cirrhosis and/or liver failure, tumor and AIDS.

**Abbreviation:** CI, confidence interval; PSM, propensity score matching; BMI, body mass index; GERD, gastroesophageal reflux disease; COPD, chronic obstructive pulmonary disease; AIDS, acquired immunodeficiency syndrome.

### Test for Interaction using Logistic/Cox regression analyses

#### Method

According to our findings, frequent drinking was associated with poor outcomes of COVID-19 in patients with obesity, but not non-obese, patients, suggesting the potential interactions of obesity on the relationship between alcohol consumption and the severe COVID-19 outcomes. Therefore, regression analysis was used to test the interaction effects between alcohol consumption and obesity in the risk of SARS-CoV-2 infection and the risk of death of COVID-19 in white participants. In this study, BMI was categorized into two groups as non-obese group=0 and obese group=1. Drinking status was also divided into two groups, frequent drinkers and non/frequent-drinkers. The logistic regression model was applied to analysis the potential interactions of obesity on the relationship between alcohol consumption and the risk of SARS-CoV-2 infection. For the risk of death in COVID-19 positive patients, the interaction effects were evaluated using the Cox regression model. Analyses were performed in PSM cohort. P value <.05 were considered statistically significant.

#### Result

Our study found that patients with obesity were more susceptible to SARS-CoV-2 infection (OR=1.017, 95%CI 1.006-1.029; P=.002, Table S9) and had a higher risk of death (HR=1.201, 95%CI=1.016-1.420; P=.032) from COVID-19 in white participants. Alcohol consumption was not associated with the risk of SARS-CoV-2 infection and the risk of death in participants with COVID-19 (All P >.05, Table S9). In addition, there was a significant interaction between obesity and alcohol consumption on the risk of death in patients with COVID-19 (HR=1.395, 95%CI=1.107-1.757; P=.005). No significant interaction between obesity and alcohol consumption on the risk of SARS-CoV-2 infection (All P >.05).

**Table S9. Logistic/Cox regression analyses of the interaction effects between alcohol consumption and obesity in the risk of SARS-CoV-2 infection and the risk of death of COVID-19 in white participants**

| Exposure and outcomes          | The risk of SARS-CoV-2 infection |         | The risk of death |         |
|--------------------------------|----------------------------------|---------|-------------------|---------|
|                                | OR (95%CI)                       | P-value | HR (95%CI)        | P-value |
| <b>BMI categories</b>          |                                  |         |                   |         |
| No-obese group                 | 1                                |         | 1                 |         |
| obese group                    | 1.02(1.01-1.03)                  | 0.002   | 1.20(1.02-1.42)   | 0.03    |
| <b>Drinking status</b>         |                                  |         |                   |         |
| Never/infrequent drinker       | 1                                |         | 1                 |         |
| Frequent drinkers              | 0.96(0.85-1.08)                  | 0.48    | 1.18(0.96-1.44)   | 0.11    |
| <b>Interaction test</b>        |                                  |         |                   |         |
| BMI categories*Drinking status | 1.08(0.93-1.26)                  | 0.32    | 1.40(1.11-1.76)   | 0.01    |

**Analyses** were performed in PSM cohort. Matching factors for PSM including age, sex, BMI categories, current smoking status, alcohol related diseases, asthma, emphysema, COPD, bronchitis/bronchiectasis, esophagitis, gastritis/duodenitis, peptic ulcer, GERD, hypertensive, chronic ischemic heart disease, heart failure, diabetes, dementia, renal failure, liver cirrhosis and/or liver failure, tumor and AIDS.

**Abbreviation:** CI, confidence interval; PSM, propensity score matching; BMI, body mass index; GERD, gastroesophageal reflux disease; COPD, chronic obstructive pulmonary disease; AIDS, acquired immunodeficiency syndrome.

#### Reference

THOMPSON, A., COOK, J., CHOQUET, H., JORGENSEN, E., YIN, J., KINNUNEN, T., BARCLAY, J., MORRIS, A. P. & PIRMOHAMED, M. 2020. Functional validity, role, and implications of heavy alcohol consumption genetic loci. *Sci Adv*, 6, eaay5034.

**Figure S1**

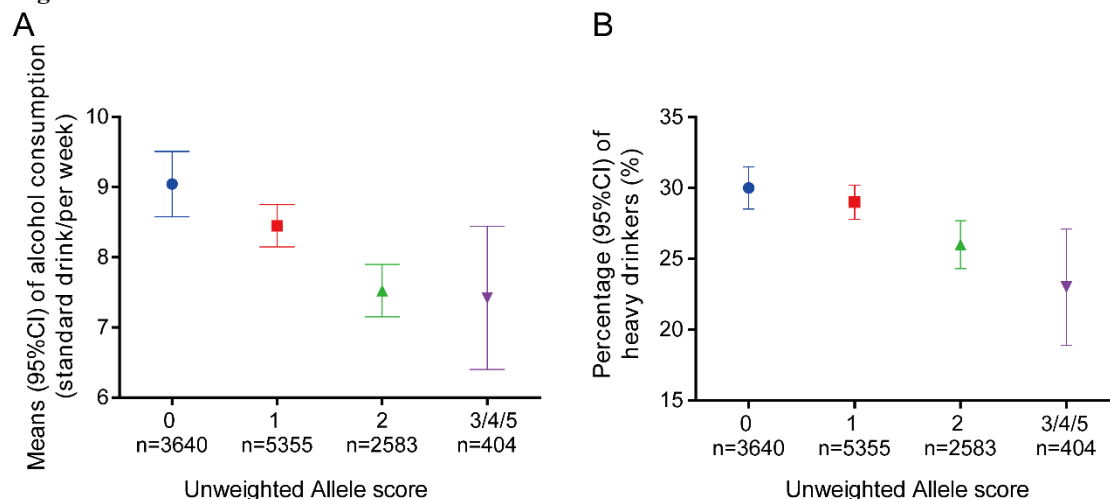

Figure S1. Association of combined ADH1B, SLC39A8, GCKR fast-allele score with average alcohol consumption levels (standard drink/weekly) in whole participants (A) and percentages of heavy-drinkers (B) in whole participants by unweighted allele score. The amount of alcohol consumed by non-drinkers was defined as zero.
